# Supplementary material for: Structure of anellovirus-like particles reveal a mechanism for immune evasion
Source: PubMed Central journal article supplement (PMC11341859; doi:10.1038/s41467-024-51064-8), 2024-08-22
Supplement: 41467_2024_51064_MOESM1_ESM.pdf [file 41467_2024_51064_MOESM1_ESM.pdf]

## Supporting Information

**Supplementary Table 1.** Cryo-EM data collection, refinement and validation statistics of LY1  $\Delta$ ARM ORF1 fragment virus-like particle.

|                                                     | LY1 $\Delta$ ARM fragment virus-like particle |
|-----------------------------------------------------|-----------------------------------------------|
| <b>Data collection and processing</b>               |                                               |
| Magnification                                       | 150000x                                       |
| Voltage (kV)                                        | 200                                           |
| Electron exposure (e <sup>-</sup> /Å <sup>2</sup> ) | 1.31                                          |
| Defocus range (μm)                                  | -0.5~ -2.5                                    |
| Pixel size (Å)                                      | 0.923                                         |
| Symmetry imposed                                    | I1                                            |
| Initial particle images (no.)                       | 58391                                         |
| Final particle images (no.)                         | 6271                                          |
| Map resolution (Å)                                  | 3.98/0.143                                    |
| FSC threshold                                       |                                               |
| Map resolution range (Å)                            | 3.9-6                                         |
| <b>Refinement</b>                                   |                                               |
| Model resolution (Å)                                | 3.98/0.143                                    |
| FSC threshold                                       |                                               |
| Model resolution range (Å)                          | 3.9-6                                         |
| Map sharpening <i>B</i> factor (Å <sup>2</sup> )    | -152.851                                      |
| Model composition                                   | 253440/30900/0                                |
| Non-hydrogen atoms                                  |                                               |
| Protein residues                                    |                                               |
| Ligands                                             |                                               |
| <i>B</i> factors (Å <sup>2</sup> )                  | 30.00/243.72/133.17                           |
| Protein                                             |                                               |
| Ligand                                              |                                               |
| R.m.s. deviations                                   | 0.007/1.282                                   |
| Bond lengths (Å)                                    |                                               |
| Bond angles (°)                                     |                                               |
| Validation                                          | 2.36/25.43/0                                  |
| MolProbity score                                    |                                               |
| Clashscore                                          |                                               |
| Poor rotamers (%)                                   |                                               |
| Ramachandran plot                                   | 92.6/6.62/0.78                                |
| Favored (%)                                         |                                               |
| Allowed (%)                                         |                                               |
| Disallowed (%)                                      |                                               |
| CC (mask)                                           | 0.81                                          |

**Supplementary Table 2.** Cryo-EM data collection, refinement and validation statistics of LY1  $\Delta$ C-Term virus-like particle.

---

| LY1 $\Delta$ C-Term virus-like particle             |                     |
|-----------------------------------------------------|---------------------|
| <b>Data collection and processing</b>               |                     |
| Magnification                                       | 105000x             |
| Voltage (kV)                                        | 300                 |
| Electron exposure (e <sup>-</sup> /Å <sup>2</sup> ) | 1.4                 |
| Defocus range (μm)                                  | -1.2~ -1.6          |
| Pixel size (Å)                                      | 0.834               |
| Symmetry imposed                                    | I1                  |
| Final particle images (no.)                         | 22743               |
| Map resolution (Å)                                  | 2.69/0.143          |
| FSC threshold                                       |                     |
| Map resolution range (Å)                            | 2.69-4.2            |
| <b>Refinement</b>                                   |                     |
| Model resolution (Å)                                | 2.83/0.143          |
| FSC threshold                                       |                     |
| Model resolution range (Å)                          | 2.8-4.2             |
| Map sharpening <i>B</i> factor (Å <sup>2</sup> )    | 83.3                |
| Model composition                                   | 253440/30900/0      |
| Non-hydrogen atoms                                  |                     |
| Protein residues                                    |                     |
| Ligands                                             |                     |
| <i>B</i> factors (Å <sup>2</sup> )                  | 30.00/243.72/133.17 |
| Protein                                             |                     |
| Ligand                                              |                     |
| R.m.s. deviations                                   | 0.012/1.291         |
| Bond lengths (Å)                                    |                     |
| Bond angles (°)                                     |                     |
| Validation                                          | 1.15/22.43/0        |
| MolProbity score                                    |                     |
| Clashscore                                          |                     |
| Poor rotamers (%)                                   |                     |
| Ramachandran plot                                   | 99.03/0.97/0        |
| Favored (%)                                         |                     |
| Allowed (%)                                         |                     |
| Disallowed (%)                                      |                     |
| CC (mask)                                           | 0.63                |

---

**A**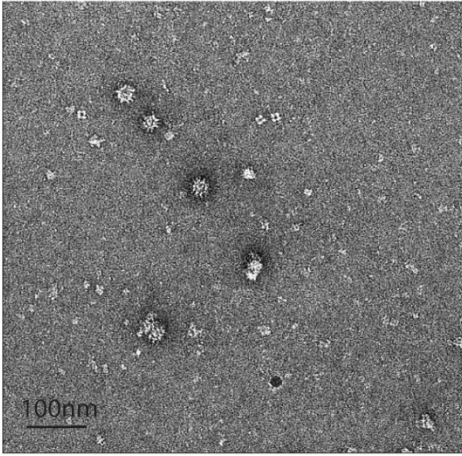**B**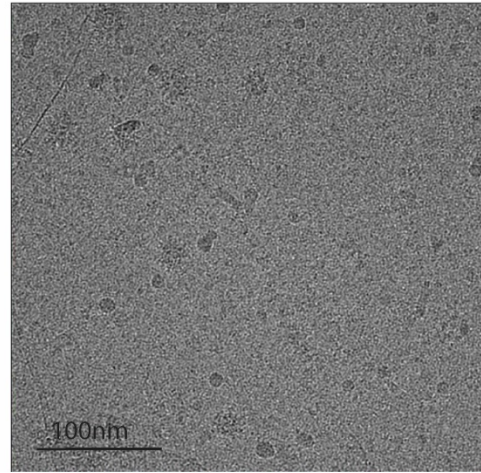

**Supplementary Fig. 1. Representative micrographs of LY1  $\Delta$ ARM fragment virus-like particle. A. and B. are representative negative-stained and cryo-EM micrographs for LY1  $\Delta$ ARM, respectively.**

crYOLO picks 58,391 particles

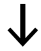

Two 2D classifications  
(1.846Å/pixel)  
Results in 11,185 particles

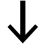

Relion-4 *de novo* 3D initial model

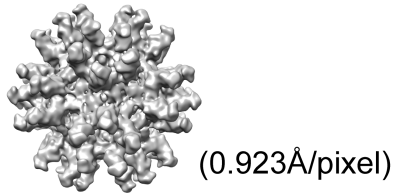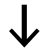

Use all particles to do Refine3D  
with the reference structure with  
lowpass filter 60Å  
with initial angular sampling 3.7°  
and local angular search 0.9°

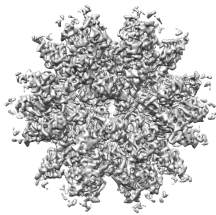

Transfer the alignment parameters  
to Relion 3D classification, with  
angular sampling interval 0.9° and  
local angular search 5°

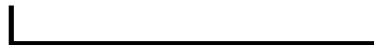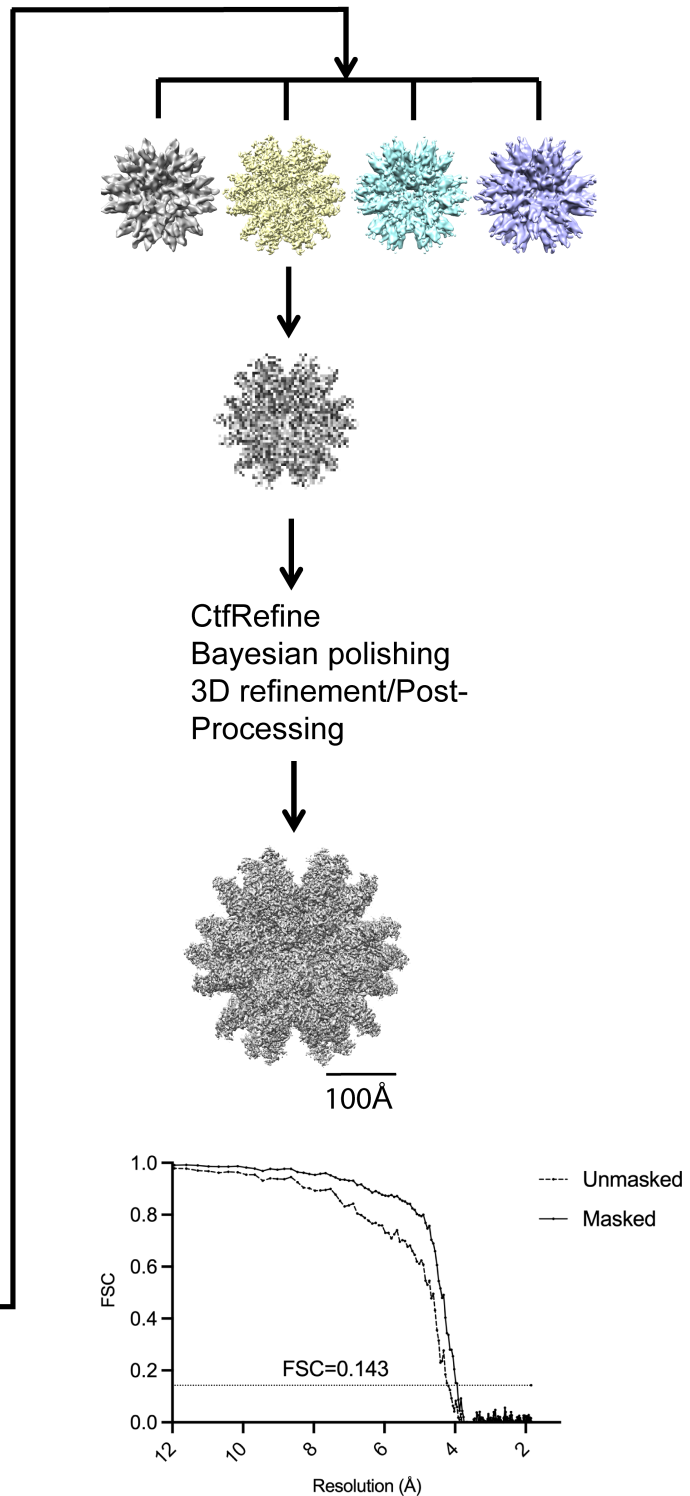

**Supplementary Fig. 2.** Image processing work-flow of the LY1  $\Delta$ ARM fragment virus-like particle.



**A**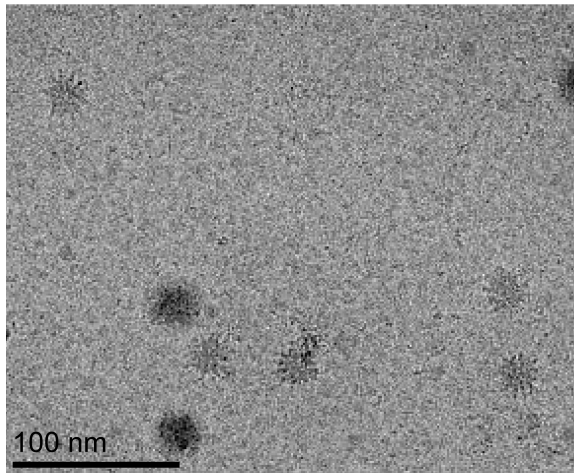**B**

Cryosparc automated particle picking with box size 500 Å

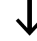

Two 2D classifications

Resulted in 23,193 particles

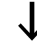

Generated 3D model using Cryosparc Ab intio model

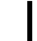

Used all particles to perform Cryosparc homogeneous refinement. Refinement resulted in 2.8Å map.

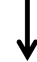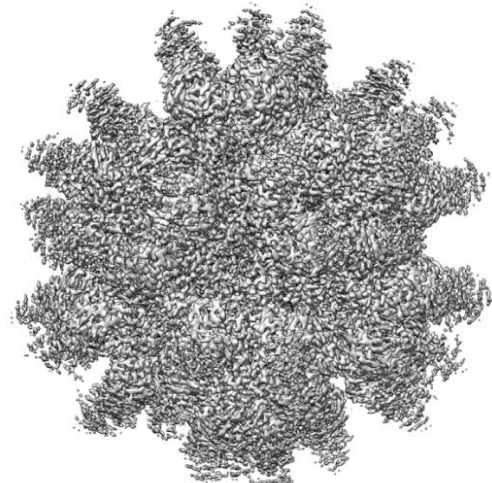

GSFSC Resolution: 2.69Å

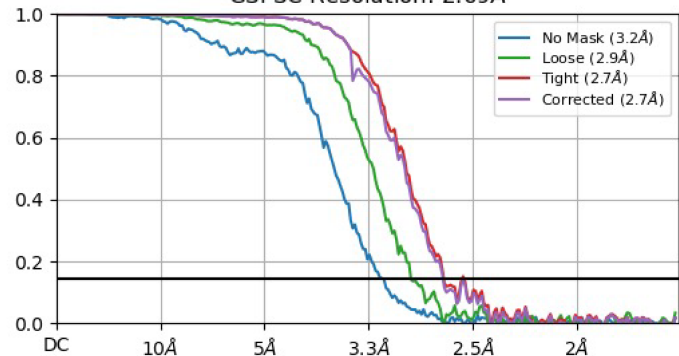

**Supplementary Fig. 3. Image processing work-flow of the LY1  $\Delta$ C-term virus-like particle:** **A.** cryo-EM micrographs for LY1  $\Delta$ C-term virus-like particle. **B.** Image processing work-flow of LY1  $\Delta$ C-term virus-like particle

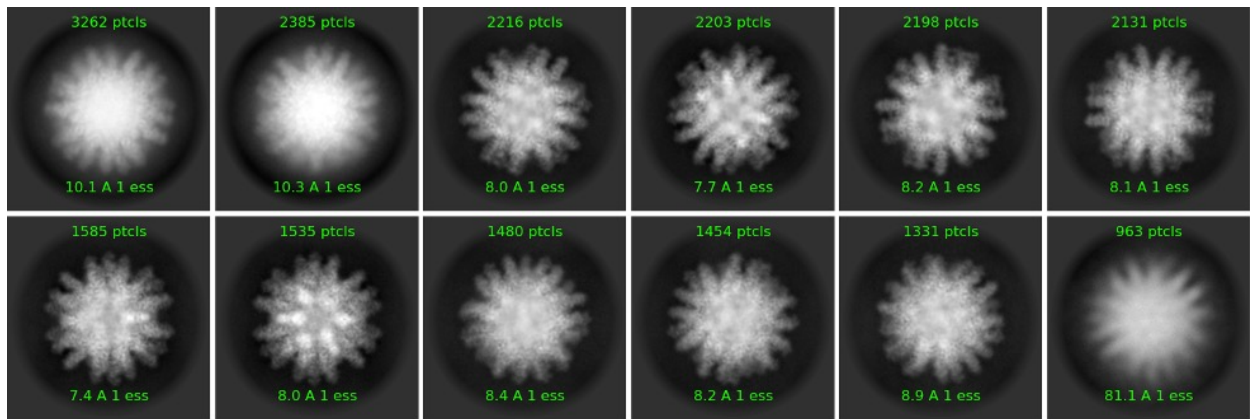

**Supplementary Fig. 4.** Representative 2D class averages of LY1  $\Delta$ C-term virus-like particle. Subset of the final round of 2D class averaging for LY1- $\Delta$ C-term virus-like particle sample obtained from cryoSPARC3.3. Box size is 500 Å.

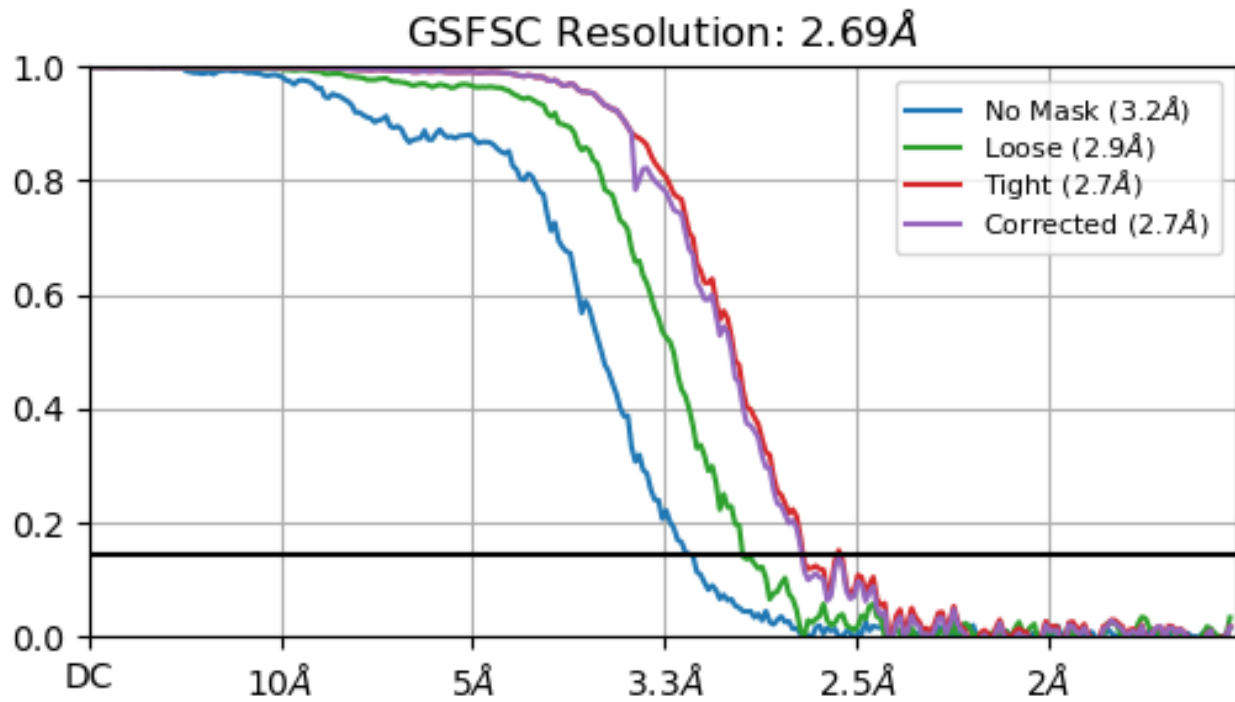

**Supplementary Fig. 5.** “Gold standard” FSC curves of the final 3D refinement for LY1  $\Delta$ C-Term virus-like particle. CryoSPARC 3.3 analysis results for different types of masks. The resolution of the final map was calculated based on a Fourier shell correlation (FSC) of 0.143.



**Supplementary Fig. 6.** Sequence alignment of 15 published anelloviruses within different genera indicated in parentheses. The residues are colored by domain as in Fig. 1. Below the alignment conserved residues (50% or greater) are indicated.

**A**

|         | $\alpha$ -helix | $\beta$ -sheet | Turns | Unordered |
|---------|-----------------|----------------|-------|-----------|
| SELCON  | 60.1%           | 4.4%           | 14.6% | 21.6%     |
| CONTILL | 70.2%           | 2.2%           | 7.9%  | 19.8%     |
| CDSSTR  | 87.7%           | 2.2%           | 3.8%  | 5.5%      |
| average | 72.7%           | 2.8%           | 8.8%  | 15.6%     |

**B**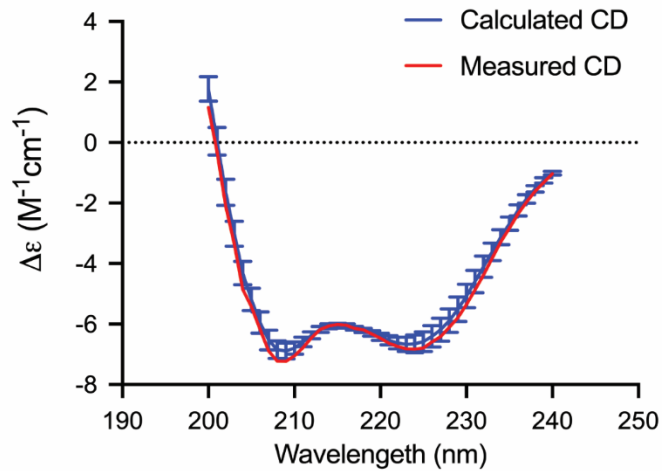

**Supplementary Fig. 7.** Circular dichroism (CD) of the LY1 C-terminal peptide **A.** Averages of secondary structure fractions estimated by different packages of CDPro.  $\alpha$ -helix dominates the secondary structure assignment from the CD spectrum. **B.** An experimental spectrum of the C-terminal peptide (shown in red) overlaid with the calculated and averaged reference set spectra (shown in blue).

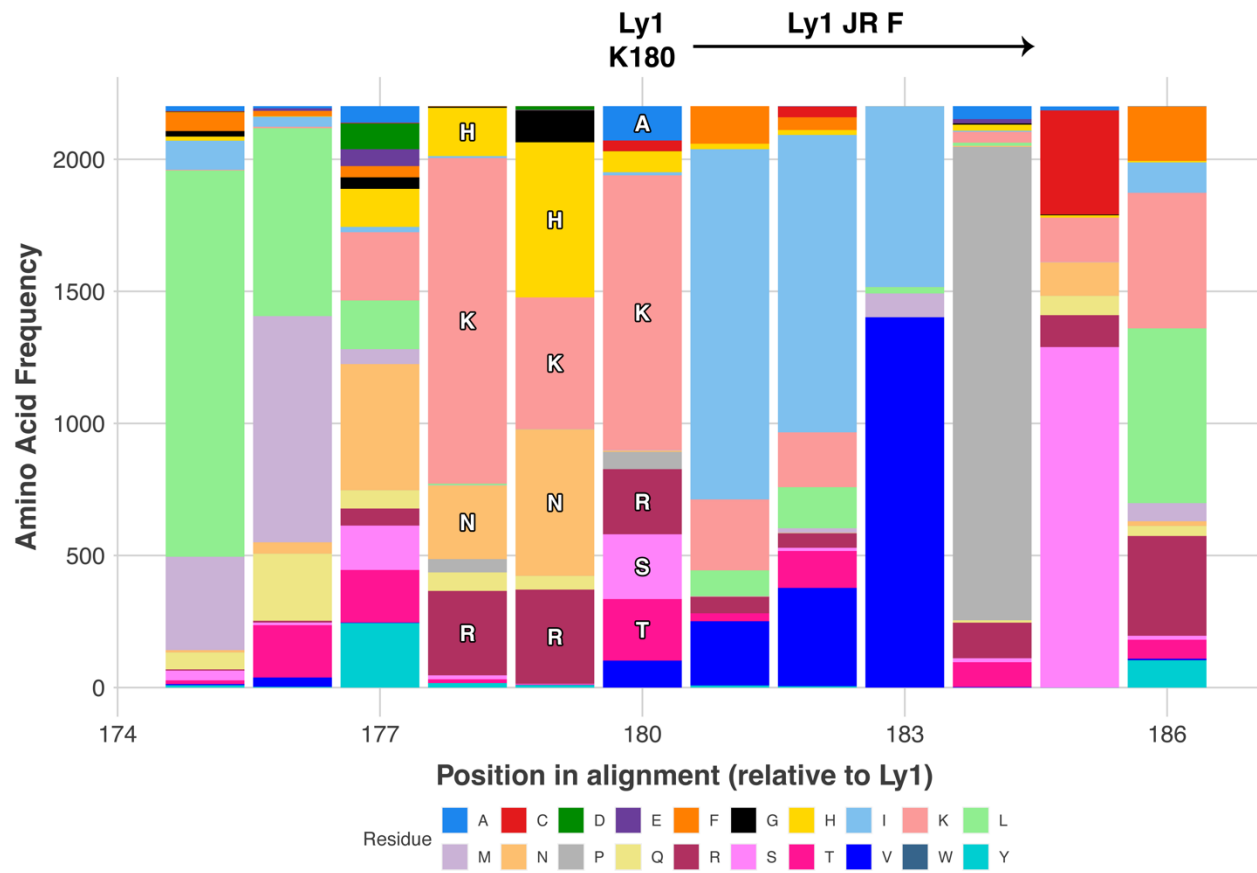

**Supplementary Fig. 8.** Amino acid distribution for *Betatorqueviruses* around jelly roll strand F. An alignment of 2201 *Betatorquevirus* ORF1 sequences was performed and the amino acid found aligned to LY1 residues 174 to 186 shown (LY1 residue number is indicated on the x-axis). The proportion of each distinct color in each indicates the absolute count of that specific residue present at that position in the alignment. Above the plot the position of LY1 Lys 180 is indicated as well as the position of jelly roll  $\beta$ -strand F. The most common residues aligned to position 178, 179 and 180 are basic or charged residues and are labeled for clarity.



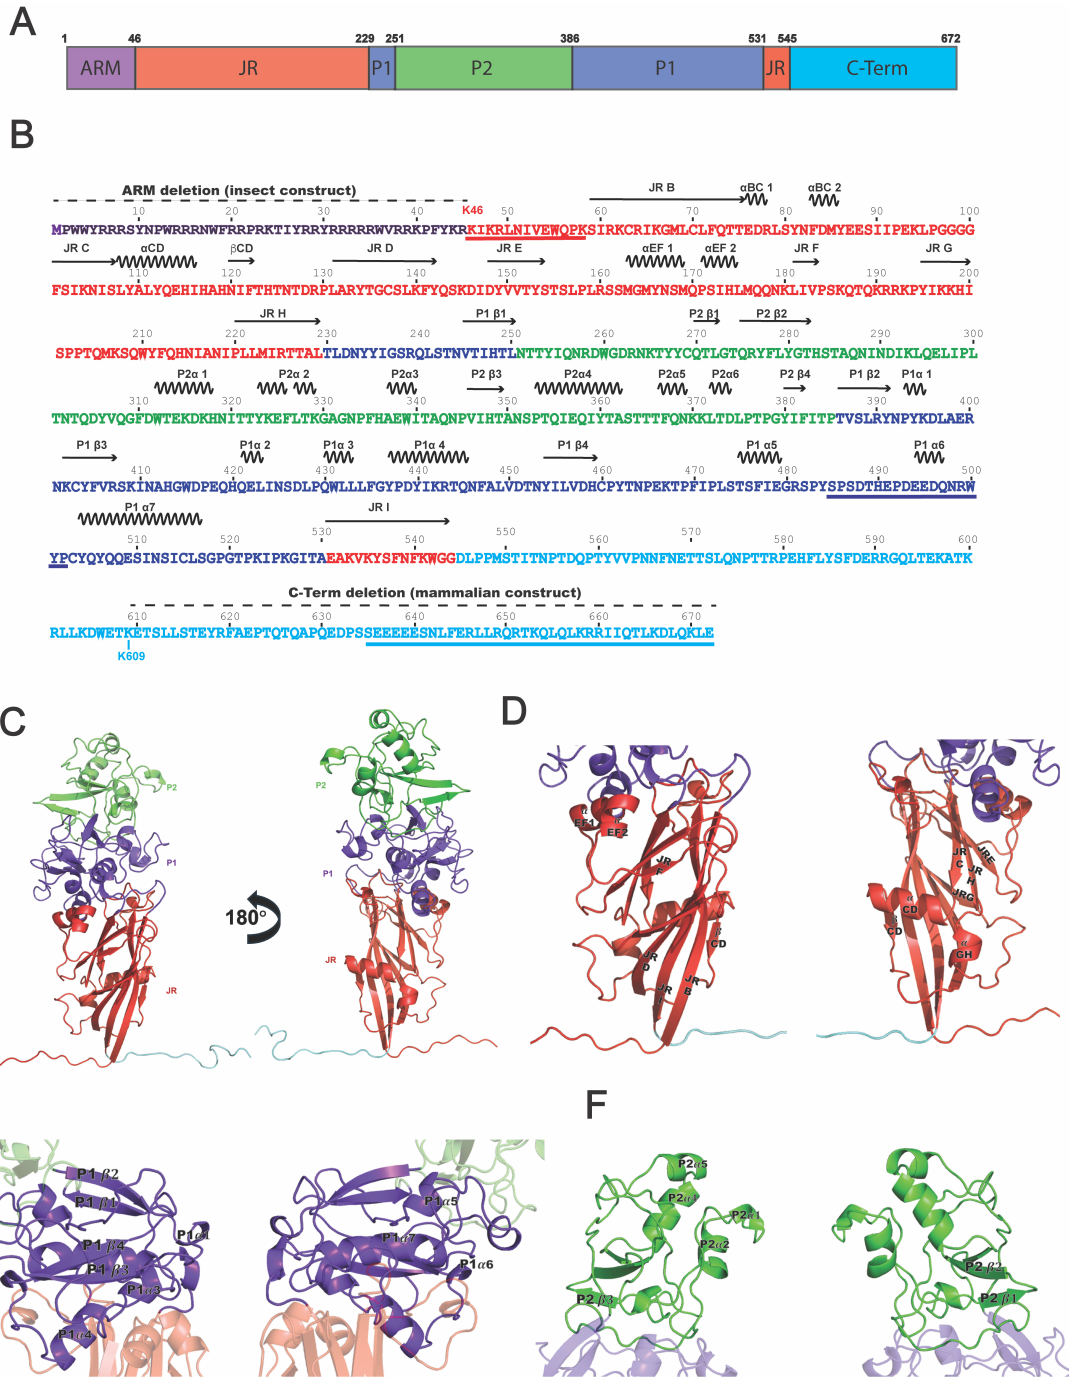

**Supplementary Fig. 9:** Secondary structural elements marked the monomeric atomic model of LY1 ΔC-term virus-like particle. **A.** Domain organization of ORF1 **B.** Secondary structural elements marked on the ORF1 primary sequence. **C.** Monomer of the ORF1 represented in two orientations. **D. E. and F.** Secondary structural elements jelly roll, P1 and P2 domains are highlighted respectively.
