# Supplementary material for: Structure of anellovirus-like particles reveal a mechanism for immune evasion
Source: PubMed Central journal article supplement (PMC11341859; doi:10.1038/s41467-024-51064-8), 2024-08-22
Supplement: 41467_2024_51064_MOESM3_ESM.pdf [file 41467_2024_51064_MOESM3_ESM.pdf]

The full content of this file cannot be displayed with your current PDF viewer. Please update to the latest possible version to view this document.
